# Supplementary material for: <em>Populus euphratica</em> CPK21 Interact with NF-YC3 to Enhance Cadmium Tolerance in Arabidopsis
Source: Preprints.org preprint supplement (doi:10.20944/preprints202405.0108.v1), 2024-05-02
Supplement: Supplementary file 1 [file supplementary]

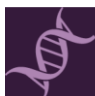

**Supplementary Table S1.** Primers used for quantitative real-time PCR.

| <b>Gene</b>     | <b>Forward primer</b>   | <b>Reverse prime</b>     |
|-----------------|-------------------------|--------------------------|
| <i>AtACTIN2</i> | GGTAACATTGTGCTCAGTGGTGG | AACGACCTTAATCTTCATGCTGC  |
| <i>AtCAT</i>    | AATATGCTGACGATGAGGATGC  | CAAGAATCAAGGAGGTAGGAGATG |
| <i>AtNF-YC3</i> | AGCTTACGTAAAGGTCTTGG    | CGGGTACCCATAACCATTC      |
| <i>AtPOD</i>    | CGTGCCCTTCATATTGTTGG    | GACGCCATCAACAACGAGTC     |
| <i>AtSOD</i>    | AGGAAACATCACTGTTGGAGAT  | GAGTTTGGTCCAGTAGAGGGAA   |

1

2

3

**Supplementary Table S2.** Primers used for gene cloning.

| <b>Gene</b>                 | <b>primers</b>                                                                                       |
|-----------------------------|------------------------------------------------------------------------------------------------------|
| <i>AtNF-YC3</i> - pBI121    | 5'-CACGGGGGACTCTAGAATGGATCAACAAGGACAATCATCAG-3'<br>5'-GACCACCCGGGGATCCATTGTCAGGATCCTGCTGCTCAG-3'     |
| <i>AtNF-YC3</i> - pGADT7    | 5'-GGAGGCCAGTGAATTCATGGATCAACAAGGACAATCATCAG-3'<br>5'-CGAGCTCGATGGATCCCTAATTGTCAGGATCCTGCTGC-3'      |
| <i>AtNF-YC3</i> - pGEX-4T-1 | 5'-TGGATCCCCGGAATTCATGGATCAACAAGGACAATCATCAG-3'<br>5'-GGCCGCTCGAGTCGACCTAATTGTCAGGATCCTGCTGC-3'      |
| <i>AtNF-YC3</i> - pMD18T    | 5'-ATGGATCAACAAGGACAATCATCAG-3'<br>5'-CTAATTGTCAGGATCCTGCTGCTCAG-3'                                  |
| <i>AtNF-YC3</i> - YNE       | 5'-CGCCACTAGTGGATCCATGGATCAACAAGGACAATCATCAG-3'<br>5'-TCCATCCCGGGAGCGGTACCATTGTCAGGATCCTGCTGCTCAG-3' |
| <i>PeCPK21</i> - pFN19K     | 5'-TTCAGAGCGATAACGCGATGGGTTGTTTTAGTAGCAA-3'<br>5'-CGAGCCCGAATTCGTTTTTAATAGAGGCTCGGTGC-3'             |
| <i>PeCPK21</i> - pGBKT7     | 5'-CATGGAGGCCGAATTCATGGGTTGTTTTAGTAGCAAAGA-3'<br>5'-GCAGGTCGACGGATCCTTAATAGAGGCTCGGTGCAGG-3'         |
| <i>PeCPK21</i> - YCE        | 5'-CGCCACTAGTGGATCCATGGGTTGTTTTAGTAGCAAAGA-3'<br>5'-TACATCCCGGGAGCGGTACCATAGAGGCTCGGTGCAGG-3'        |

4

5

6

**Supplementary Table S3.** Accession numbers of NF-Y orthologs.

|           | <b>Accession number</b> |
|-----------|-------------------------|
| AtNF-YC1  | NP_190428.1             |
| AtNF-YC2  | NP_001077726.1          |
| AtNF-YC3  | NP_175880.1             |
| AtNF-YC4  | NP_001032130.1          |
| AtNF-YC5  | NP_199860.1             |
| AtNF-YC6  | NP_199859.1             |
| AtNF-YC7  | NP_199858.1             |
| AtNF-YC8  | NP_198143.1             |
| AtNF-YC9  | NP_172371.1             |
| AtNF-YC11 | NP_187854.2             |
| AtNF-YC12 | NP_198630.2             |
| NtNF-YC1  | XP_016511061.1          |
| NtNF-YC9  | XP_016515372.1          |
| OsNF-YC2  | XP_015628319.1          |
| OsNF-YC4  | XP_015627520.1          |
| OsNF-YC6  | XP_015611933.1          |
| PtHAP5.3  | UER43237.1              |
| PtNF-YC1  | UER43240.1              |
| PtrNF-YC1 | XP_024442550.1          |
| PtrNF-YC2 | XP_002310081.2          |
| PtrNF-YC3 | XP_002319553.1          |
| PtrNF-YC4 | XP_024438371.2          |
| PtrNF-YC9 | XP_052311030.1          |
| ZmNF-YC1  | NP_001147992.1          |
| ZmNF-YC2  | AQK81605.1              |
| ZmNF-YC4  | NP_001136950.1          |
| ZmNF-YC6  | NP_001149301.1          |

7

8
